# Supplementary material
Source: publisher figshare collection journal article supplement (https://acs.figshare.com/ndownloader/files/4602076)
Supplement: Supplementary file 1 [file 4602076]

# checkCIF/PLATON report (publication check)

No syntax errors found.

Please wait while processing ....

[CIF dictionary](#)

[Interpreting this report](#)

## Datablock: Mn26

|                    |                                           |                                 |
|--------------------|-------------------------------------------|---------------------------------|
| Bond precision:    | C-C = 0.0097 Å                            | Wavelength=0.71073              |
| Cell:              | a=34.6879(10) b=34.6879(10) c=34.6879(10) |                                 |
|                    | alpha=90 beta=90 gamma=90                 |                                 |
| Temperature:       | 100 K                                     |                                 |
|                    | Calculated                                | Reported                        |
| Volume             | 41738(2)                                  | 41738(2)                        |
| Space group        | F d -3                                    | F d -3                          |
| Hall group         | -F 2uv 2vw                                | -F 2uv 2vw                      |
| Moiety formula     | C150 H150 Mn26 N24 O58, 3(O)              | C150 H150 Mn26 N24 O58, 3(O)    |
| Sum formula        | C150 H150 Mn26 N24 O61                    | C150 H150 Mn26 N24 O61          |
| Mr                 | 4693.38                                   | 4693.38                         |
| Dx,g cm-3          | 1.494                                     | 1.494                           |
| Z                  | 8                                         | 8                               |
| Mu (mm-1)          | 1.587                                     | 1.587                           |
| F000               | 18848.0                                   | 18848.0                         |
| F000'              | 18925.04                                  |                                 |
| h,k,lmax           | 42,42,42                                  | 42,42,42                        |
| Nref               | 3267                                      | 3201                            |
| Tmin,Tmax          | 0.690,0.867                               | 0.678,0.863                     |
| Tmin'              | 0.635                                     |                                 |
| Correction method= | AbsCorr=MULTI-SCAN                        |                                 |
| Data completeness= | Ratio =                                   | Theta(max)= 25.490              |
| 0.980              |                                           |                                 |
| R(reflections)=    | 0.0580( 1657)                             | wR2(reflections)= 0.1532( 3201) |
| S = 0.994          | Npar= 216                                 |                                 |

The following ALERTS were generated. Each ALERT has the format

**test-name\_ALERT\_alert-type\_alert-level.**

Click on the hyperlinks for more details of the test.

### Alert level A

[PLAT601\\_ALERT\\_2\\_A](#) Structure Contains Solvent Accessible VOIDS of . 6344.00 Å\*\*3

**Author Response: This is due to the space between the large 'spherical' molecules in the crystal structure,**

**and it likely contains very disordered solvent of crystallization.**

### Alert level B

[PLAT230\\_ALERT\\_2\\_B](#) Hirshfeld Test Diff for O7 -- C13 .. 8.04 su

**Author Response: O7 and C13 atoms constitute a disordered methanol molecule which exhibits orientational disorder about a 2-fold rotation axis.**

**Alert level C**

|                                   |                                                  |            |
|-----------------------------------|--------------------------------------------------|------------|
| <a href="#">PLAT232 ALERT 2 C</a> | Hirshfeld Test Diff (M-X) Mn4 -- O6 ..           | 5.38 su    |
| <a href="#">PLAT301 ALERT 3 C</a> | Main Residue Disorder .....                      | 4.00 Perc. |
| <a href="#">PLAT311 ALERT 2 C</a> | Isolated Disordered Oxygen Atom (No H's ?) ..... | <O8        |
| <a href="#">PLAT341 ALERT 3 C</a> | Low Bond Precision on C-C Bonds (x 1000) Ang ... | 10         |
| <a href="#">PLAT731 ALERT 1 C</a> | Bond Calc 1.910(4), Rep 1.9093(15) .....         | 2.67 su-Ra |
|                                   | MN3 -O3 1.555 1.555                              |            |
| <a href="#">PLAT731 ALERT 1 C</a> | Bond Calc 1.910(4), Rep 1.9092(15) .....         | 2.67 su-Ra |
|                                   | O3 -MN3 1.555 48.555                             |            |
| <a href="#">PLAT731 ALERT 1 C</a> | Bond Calc 1.910(4), Rep 1.9094(15) .....         | 2.67 su-Ra |
|                                   | O3 -MN3 1.555 18.555                             |            |
| <a href="#">PLAT764 ALERT 4 C</a> | Overcomplete CIF Bond List Detected (Rep/Expd) . | 1.43 Ratio |

**Alert level G**

|                                   |                                                |             |
|-----------------------------------|------------------------------------------------|-------------|
| <a href="#">PLAT860 ALERT 3 G</a> | Note: Number of Least-Squares Restraints ..... | 19          |
| <a href="#">PLAT302 ALERT 4 G</a> | Anion/Solvent Disorder .....                   | 25.00 Perc. |

- 1 **ALERT level A** = In general: serious problem  
 1 **ALERT level B** = Potentially serious problem  
 8 **ALERT level C** = Check and explain  
 2 **ALERT level G** = General alerts; check

- 3 ALERT type 1 CIF construction/syntax error, inconsistent or missing data  
 4 ALERT type 2 Indicator that the structure model may be wrong or deficient  
 3 ALERT type 3 Indicator that the structure quality may be low  
 2 ALERT type 4 Improvement, methodology, query or suggestion  
 0 ALERT type 5 Informative message, check

**checkCIF publication errors****Alert level A**

[PUBL012 ALERT 1 A](#) \_publ\_section\_abstract is missing.

Abstract of paper in English.

[PUBL024 ALERT 1 A](#) The number of authors is greater than 5.

Please specify the role of each of the co-authors  
for your paper.

**Alert level G**

[PUBL013 ALERT 1 G](#) The \_publ\_section\_comment (discussion of study) is  
missing. This is required for a full paper submission (but is  
optional for an electronic paper).

[PUBL017 ALERT 1 G](#) The \_publ\_section\_references section is missing or  
empty.

- 2 **ALERT level A** = Data missing that is essential or data in wrong format  
 2 **ALERT level G** = General alerts. Data that may be required is missing

## Publication of your CIF

You should always attempt to resolve as many as possible of the alerts in all categories. Often the minor alerts point to easily fixed oversights, errors and omissions in your CIF or refinement strategy, so attention to these fine details can be worthwhile. In order to resolve some of the more serious problems it may be necessary to carry out additional measurements or structure refinements. However, the nature of your study may justify the reported deviations from the submission requirements of the journal and these should be commented upon in the discussion or experimental section of a paper - after all, they might represent an interesting feature.

If level A alerts remain, which you believe to be justified deviations, and you intend to submit this CIF for publication in Acta Crystallographica Section C or Section E, you should additionally insert an explanation in your CIF using the Validation Reply Form (VRF) below. Your explanation will be considered as part of the review process.

If you intend to submit to another section of Acta Crystallographica or Journal of Applied Crystallography or Journal of Synchrotron Radiation, you should make sure that at least a [basic structural check](#) is run on the final version of your CIF prior to submission.

```
# start Validation Reply Form
_vrf_PUBL012_GLOBAL
;
PROBLEM: _publ_section_abstract is missing.
RESPONSE: ...
;
_vrf_PUBL024_GLOBAL
;
PROBLEM: The number of authors is greater than 5.
RESPONSE: ...
;
# end Validation Reply Form
```

If you wish to submit your CIF for publication in Acta Crystallographica Section C or E, you should upload your CIF via [the web](#). If your CIF is to form part of a submission to another IUCr journal, you will be asked, either during electronic [submission](#) or by the Co-editor handling your paper, to upload your CIF via our web site.

---

PLATON version of 29/04/2008; check.def file version of 22/04/2008

**Datablock Mn26** - ellipsoid plot

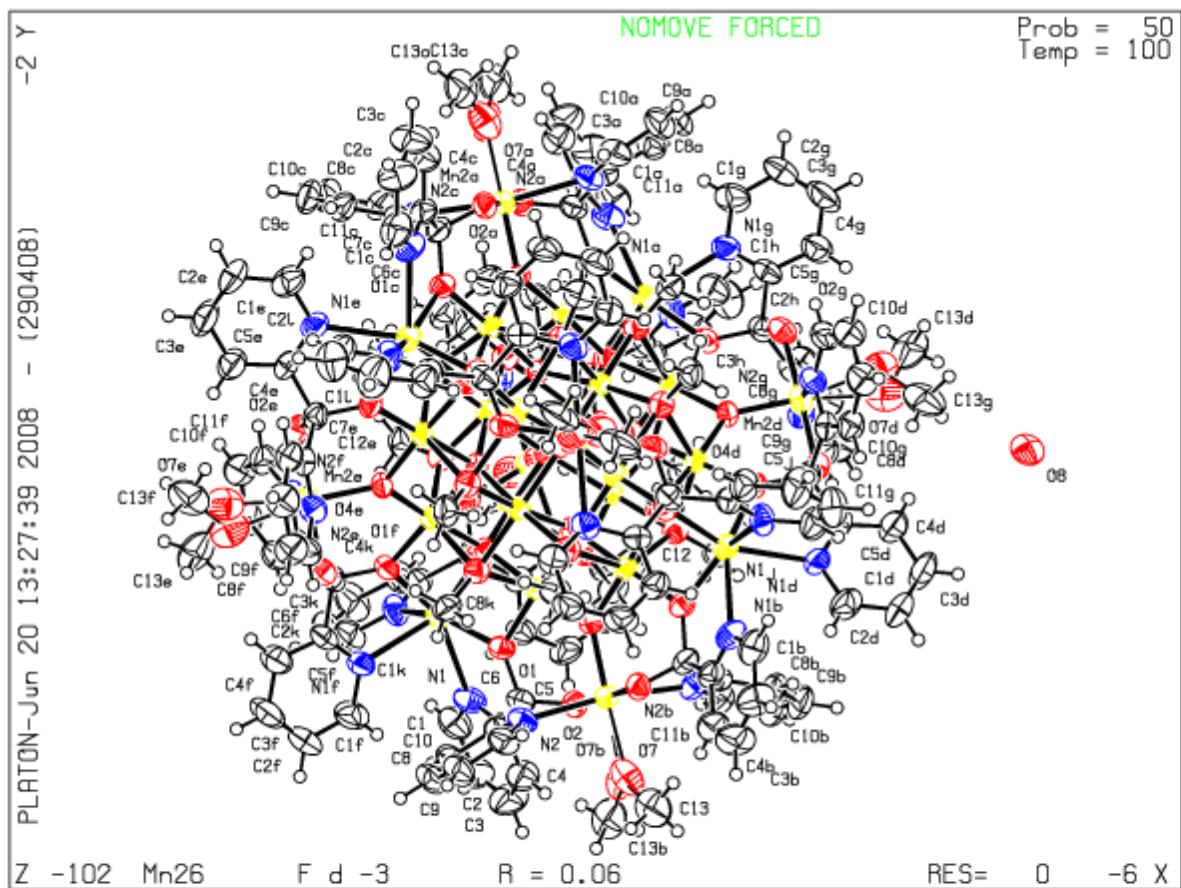

[Download CIF editor \(enCIFer\) from the CCDC](#)

[Test a new CIF entry](#)
